# Supplementary material
Source: PubMed Central journal article supplement (PMC2679429)

## SUPPLEMENTAL METHODS

*Immunofluorescence:* Cells were grown on Matrigel-coated glass coverslips (1:50, BD Biosciences) and immunofluorescence was performed as previously described. To determine phospho-MLC2 association with stress fibers, five representative images for each experimental condition were masked for rhodamine-phalloidin intensity and the mean intensity of phospho-MLC2 was measured on this mask.

*In vitro tube formation assay:* Tube formation was performed as previously described.

*HUVEC Permeability Assay:* Permeability assays were performed as previously described. Every 15 minutes for 1.5 hours, 50  $\mu$ L aliquots were removed from the lower chamber, and FITC intensity was measured using a PHERAstar microplate reader (BMG Labtech). Relative fluorescence units (RFU) were plotted against time and reported as the average change in RFU per minute between duplicate Transwells.

## SUPPLEMENTAL FIGURE LEGENDS

**Supplemental Fig. 1.** Smurf1 binds MEKK3 and CCM2. A) Cells expressing HA-tagged CCM2, MEKK2, or MEKK3 with Flag-Smurf1 C699A were immunoprecipitated with anti-HA antibody and associated Flag-Smurf1 C699A was determined by western blot. B) The Smurf1-MEKK3 interaction is direct. Purified GST or GST-Smurf1 was incubated with purified His-MEKK3 and associating MEKK3 was determined by western blot using anti-MEKK3 antibody. C) CCM2 interacts with the Smurf1 HECT domain in a PTB domain dependant manner. Flag-Smurf1 HECT was expressed with either CFP-CCM2 or CFP-CCM2 F217A in cells. Cell lysates were incubated with anti-Flag and associating CFP-CCM2 was determined by western blot. D) CCM2 can associate with either Smurf1 or Smurf2. Cells expressing HA-CCM2 and either Flag-Smurf1 C699A or Flag-Smurf2 C716A were lysed and immunoprecipitated with anti-Flag antibody. Associating HA-CCM2 was determined western blot with anti-HA antibody.

**Supplemental Fig. 2.** CCM2 knockdown leads to cytoskeletal changes in brain endothelial cells. A) Relative quantitation of CCM2 RNA expression was determined by real time RT-PCR quantitation. Representative data shown. CCM2 RNA levels were standardized to  $\beta$ -actin RNA levels. B) Relative quantitation of RhoA RNA expression was determined by real time RT-PCR quantitation. Representative data shown. RhoA RNA levels were standardized to  $\beta$ -actin RNA levels. C) bEND.3 cells stably expressing pLKO.1 or CCM2 shRNA were plated on Matrigel-coated coverslips and stained for phalloidin (red), phospho(Ser19)-MLC2 (green), and DAPI (blue). D) Association of phospho-MLC2 with stress fibers is abrogated with treatment with the ROCK inhibitor Y-27632. Top: bEND.3 cells grown on coverslips were treated with or without Y-27632 for 24 hours and then stained for phospho(Ser19)-MLC2. E) Intensity of phosphorylated MLC-2 associated with rhodamine-phalloidin was determined as described in *Materials and Methods*.

**Supplemental Fig. 3.** CCM2 is necessary for endothelial barrier function and endothelial tubule formation. A) HUVECs electroporated with either CCM2 SMARTpool siRNA or scrambled siRNA were plated on duplicate Matrigel-coated Transwells and were allowed form monolayers for 48 hours. The medium was then removed and replaced with EBM-2 containing 0.625 mg/mL FITC-dextran, with or without 4 mM EGTA. Aliquots (50  $\mu$ L) were removed from the bottom well at 15 minute increments for 1.5 hours and fluorescence was read using a PHERAstar microplate reader. Data is expressed as the change in relative fluorescence units (RFU) per minute  $\pm$  the standard deviation of the duplicates. Results are representative of three experiments. The average percent knockdown of CCM2 RNA levels compared to scrambled controls was  $\sim$ 60%. B) Mouse embryonic endothelial cells stably expressing either pLKO.1 or CCM2 shRNA were subjected to an in vitro tube formation assay as described in *Materials and Methods*.

Supplemental Figure 1

**A.**

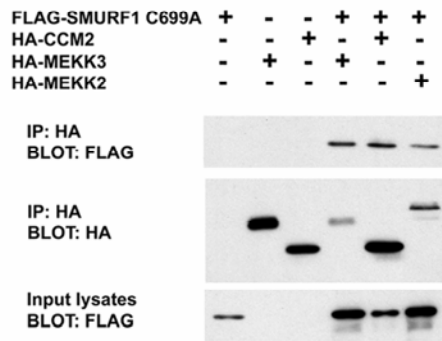

**B.**

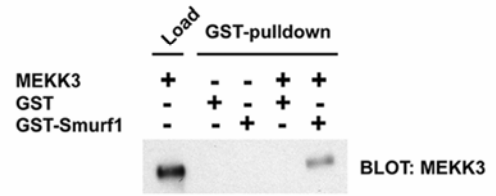

**C.**

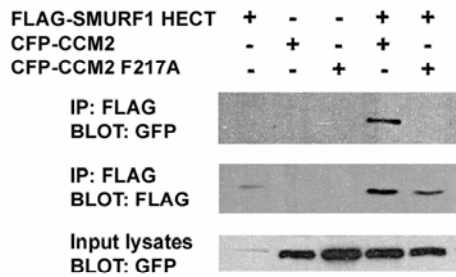

**D.**

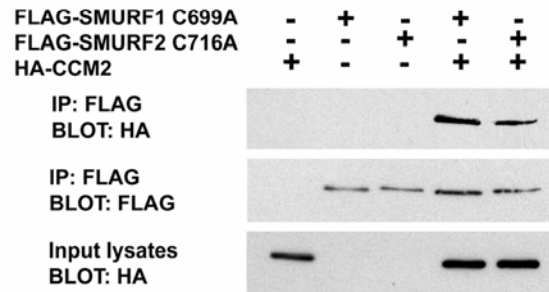

Supplemental Figure 2

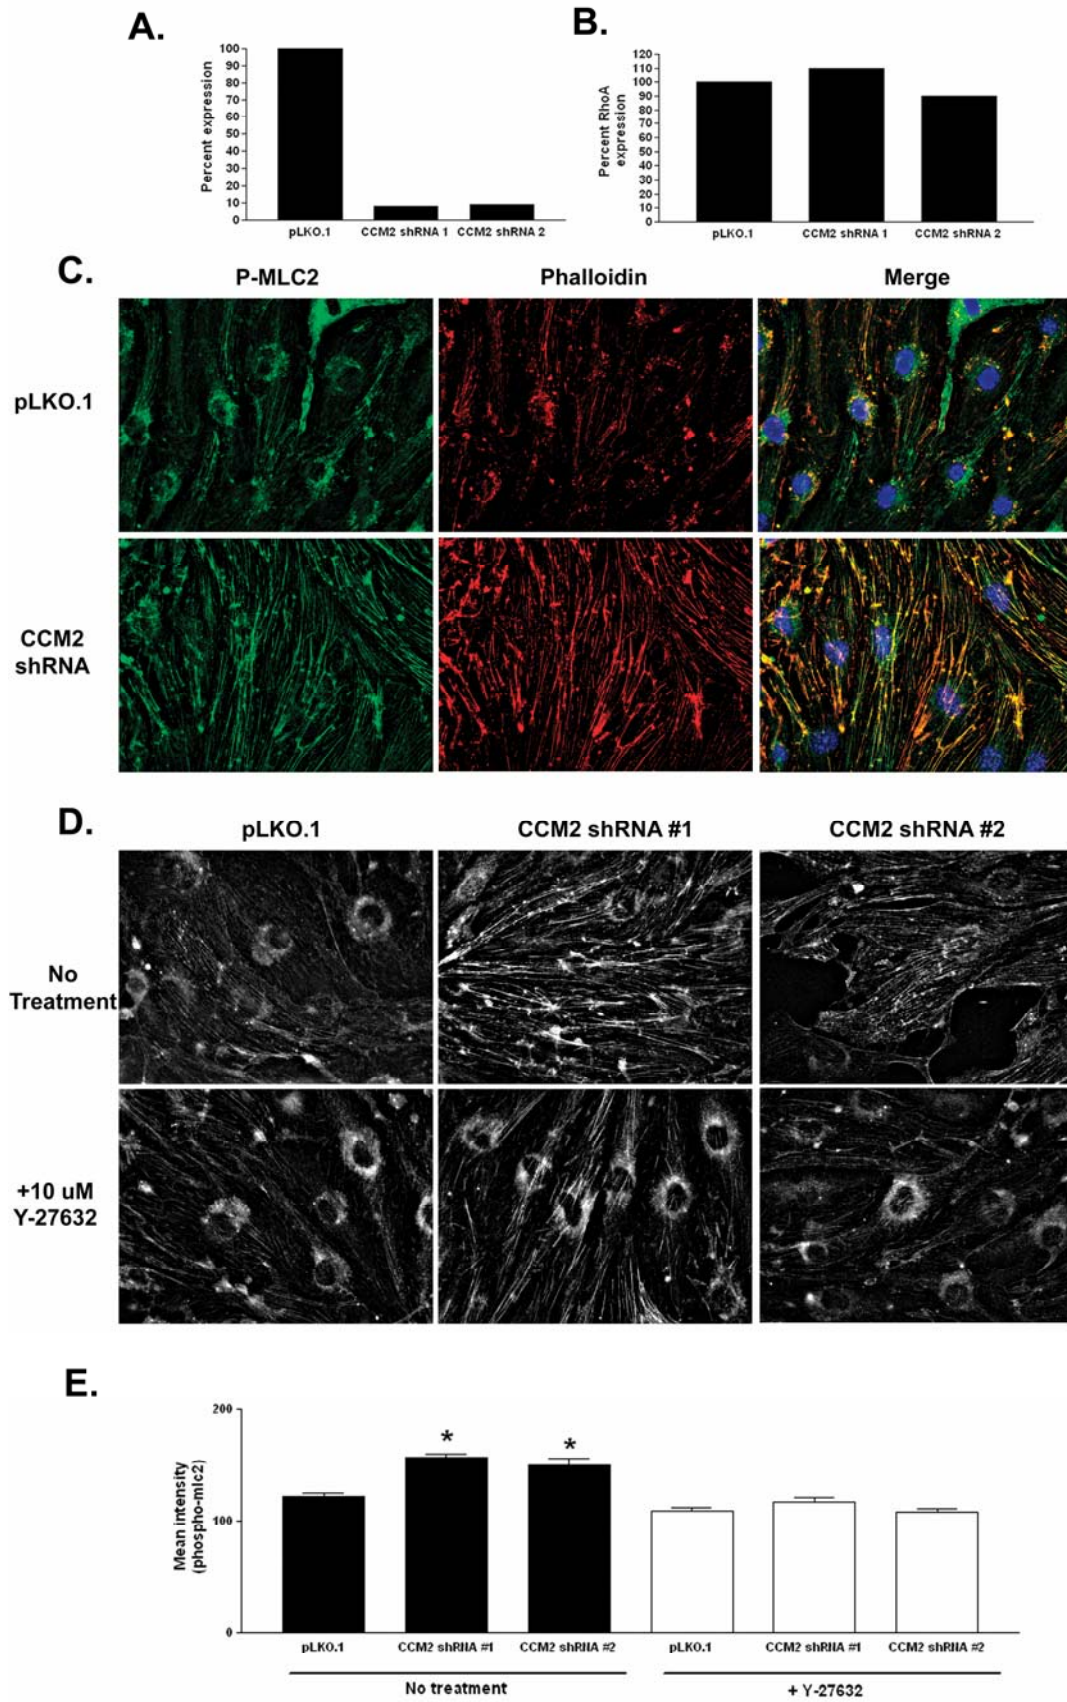

**A.**

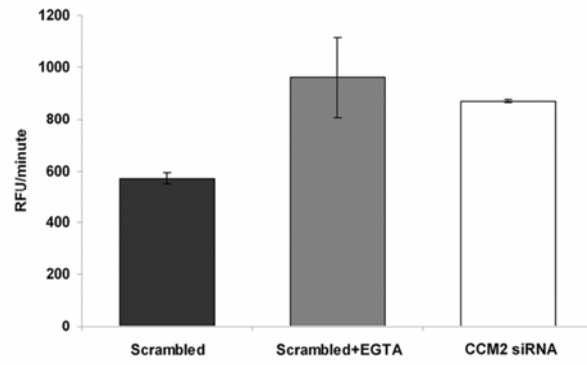

**B.**

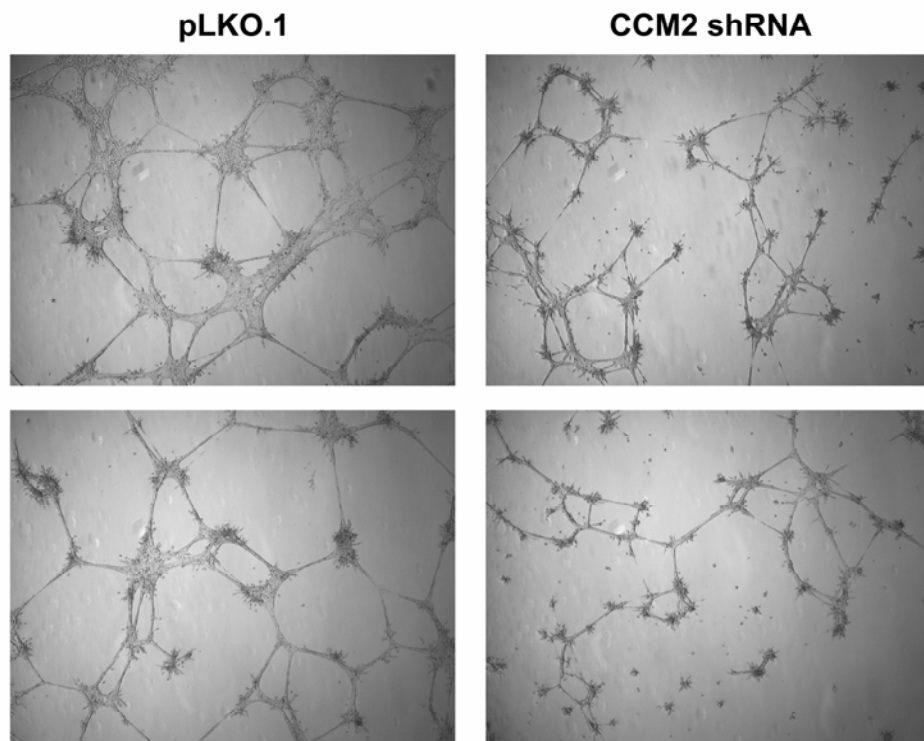

Supplement: C900009200_1.pdf [file C900009200_1.pdf]
